# Supplementary material for: Ultra-thermostable soy protein particles prepared by combining preheating treatment with slightly alkaline pH
Source: Royal Society of Chemistry journal article supplement (doi:10.1039/d2fo01255c), 2022-01-01
Supplement: d2fo01255c1.pdf [file d2fo01255c1.pdf]

**Table S1** The correlation between the storage modulus at 1Hz and protein structures of SPs

|                                             | The changing rate of the maximum fluorescence intensity | The changing rate of ellipticity at 202 nm | Surface charge |
|---------------------------------------------|---------------------------------------------------------|--------------------------------------------|----------------|
| The storage modulus of samples at 20% (w/v) | 0.883*                                                  | 0.997**                                    | -0.986**       |

\*\* , p<0.01; \* , p<0.05
